# Supplementary material for: Highly diastereoselective synthesis of piperidine-2-one-substituted pyridinium salts from pyridinium ylides, aldehydes, Michael acceptors and ammonium acetate
Source: Research Square preprint supplement (doi:10.21203/rs.3.rs-3152629/v1), 2023-07-13
Supplement: Supplementary file 1 [file 6888ecf4c08716a3cfc5db69.docx]

**Supporting Information**

**Highly diastereoselective synthesis of pyridinium salts of 2‑piperidinones from pyridinium ylides, aldehydes, Michael acceptors and ammonium acetate.**

Andrey D. Vinokurov,a Taygib M. Iliyasov,a Kirill A. Karpenko,a Radmir N. Akchurin,a,b Yana V. Derkacha,b and Anatoly N. Vereshchagina*

- 1. N. D. Zelinsky Institute of Organic Chemistry, Leninsky Prospect 47, Moscow, Russian Federation 119334; vereshchagin@ioc.ac.ru (A.N.V.)
  2. Mendeleev University of Chemical Technology of Russia, Miusskaya Square 9, Moscow, Russian Federation 125047;

**Content:**

[1H, 13C NMR spectra of compounds 4a-i 2](#_Toc139577653)

[1H, 13C NMR spectra of compounds 5a-e 11](#_Toc139577654)

#

# **1H, 13C NMR spectra of compounds 4a-i**

**1H NMR** of 1-((3*SR*,4*RS*,6*SR*)-5,5-dicyano-2-oxo-4,6-diphenylpiperidin-3-yl)pyridin-1-ium bromide **(4a)**


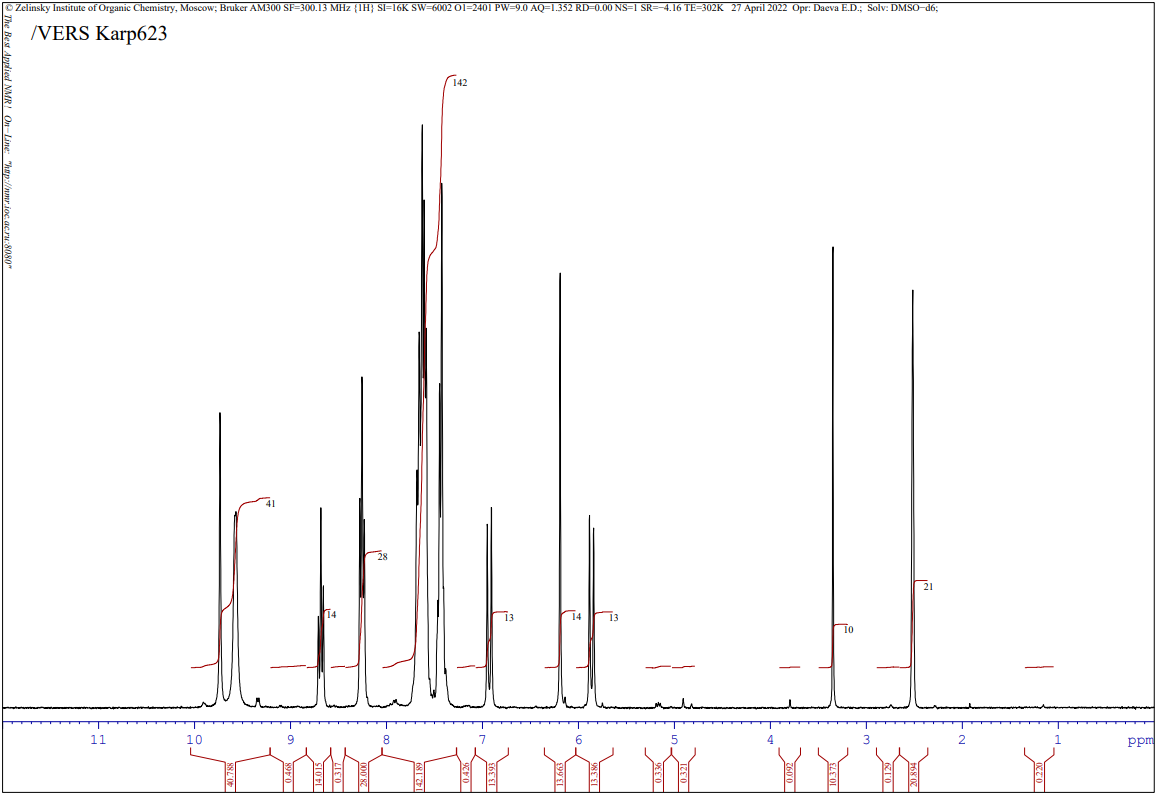


**13C NMR** of **(4a)**


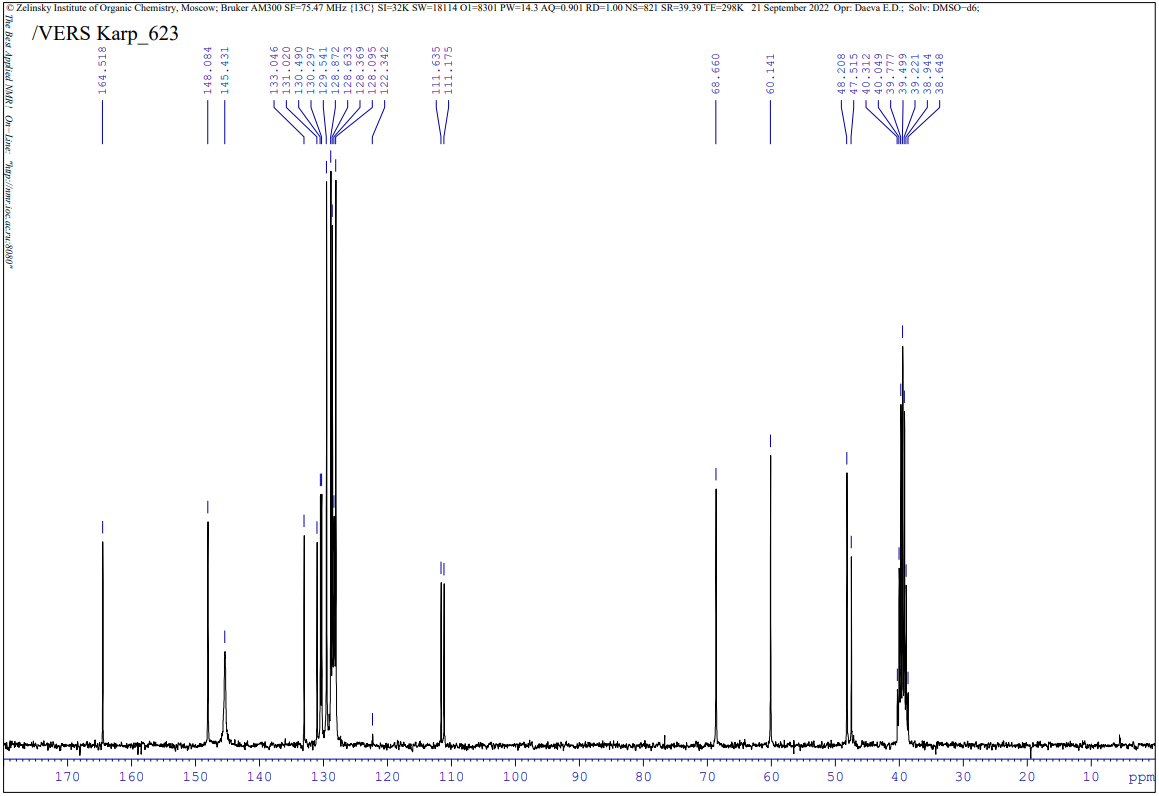


**1H NMR** of 1-((3*SR*,4*RS*,6*SR*)-5,5-dicyano-2-oxo-4,6-di-m-tolylpiperidin-3-yl)pyridin-1-ium bromide **(4b)**


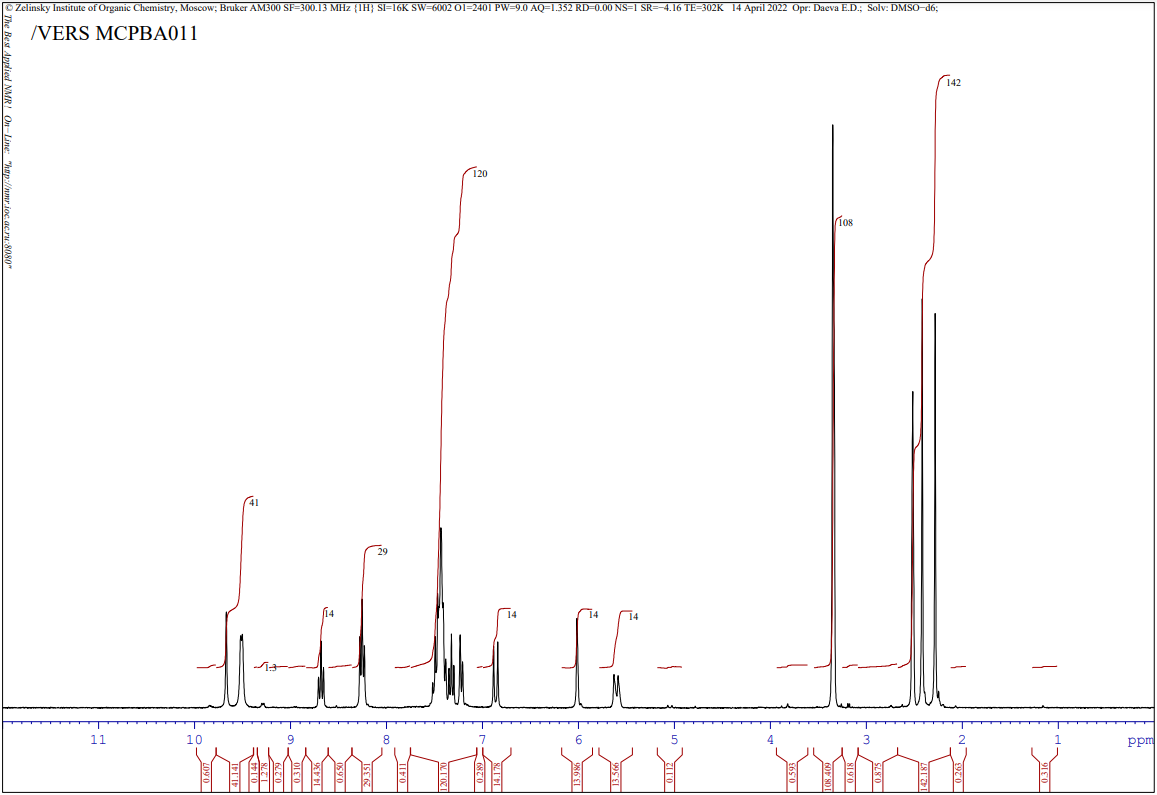


**13C NMR** of **(4b)**


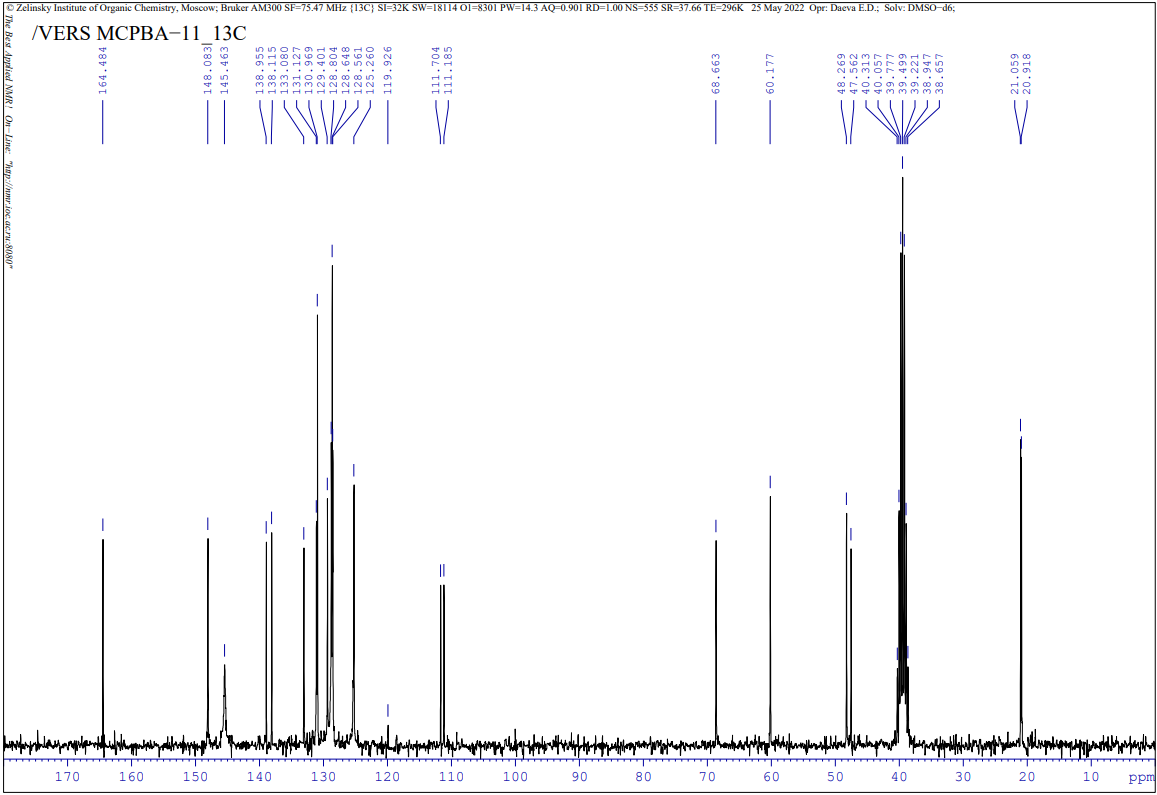


**1H NMR** of 1-((3*SR*,4*RS*,6*SR*)-5,5-dicyano-4,6-bis(4-fluorophenyl)-2-oxopiperidin-3-yl)pyridin-1-ium bromide **(4c)**


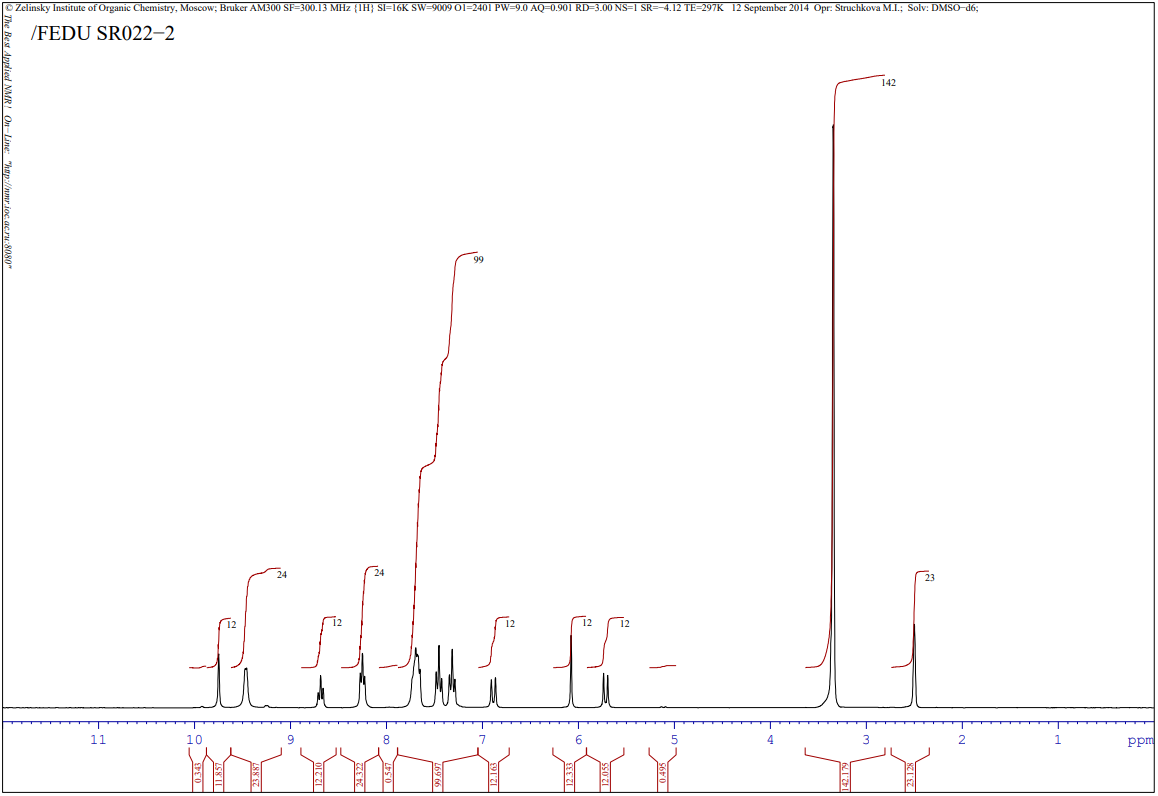


**13C NMR** of **(4c)**


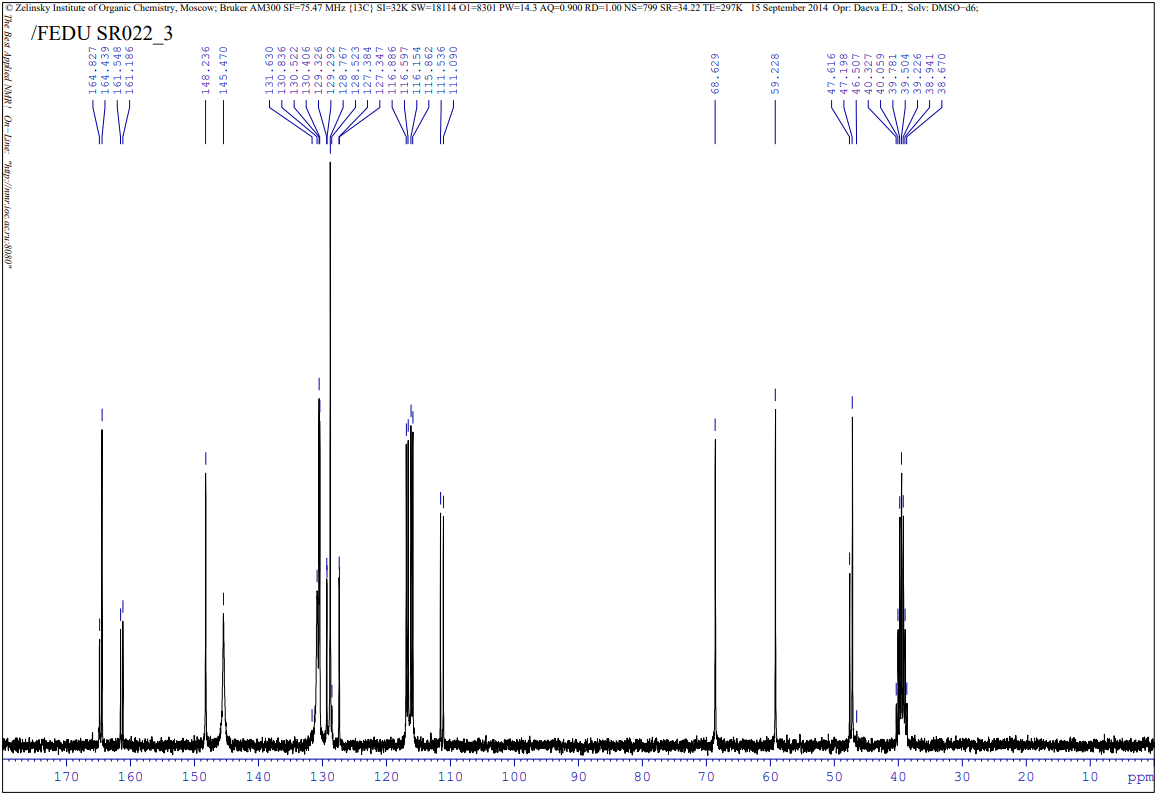


**1H NMR** of 1-((3*SR*,4*RS*,6*SR*)-4,6-bis(3-bromophenyl)-5,5-dicyano-2-oxopiperidin-3-yl)pyridin-1-ium bromide **(4d)**


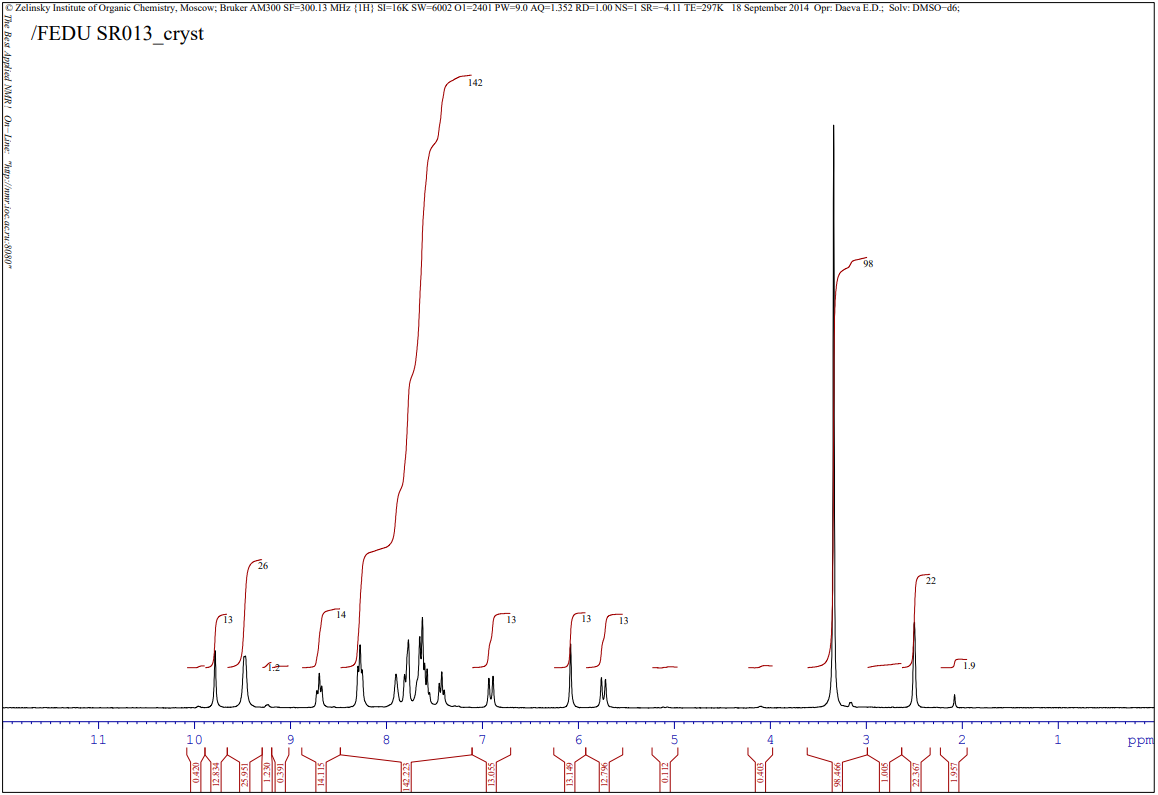


**13C NMR** of **(4d)**


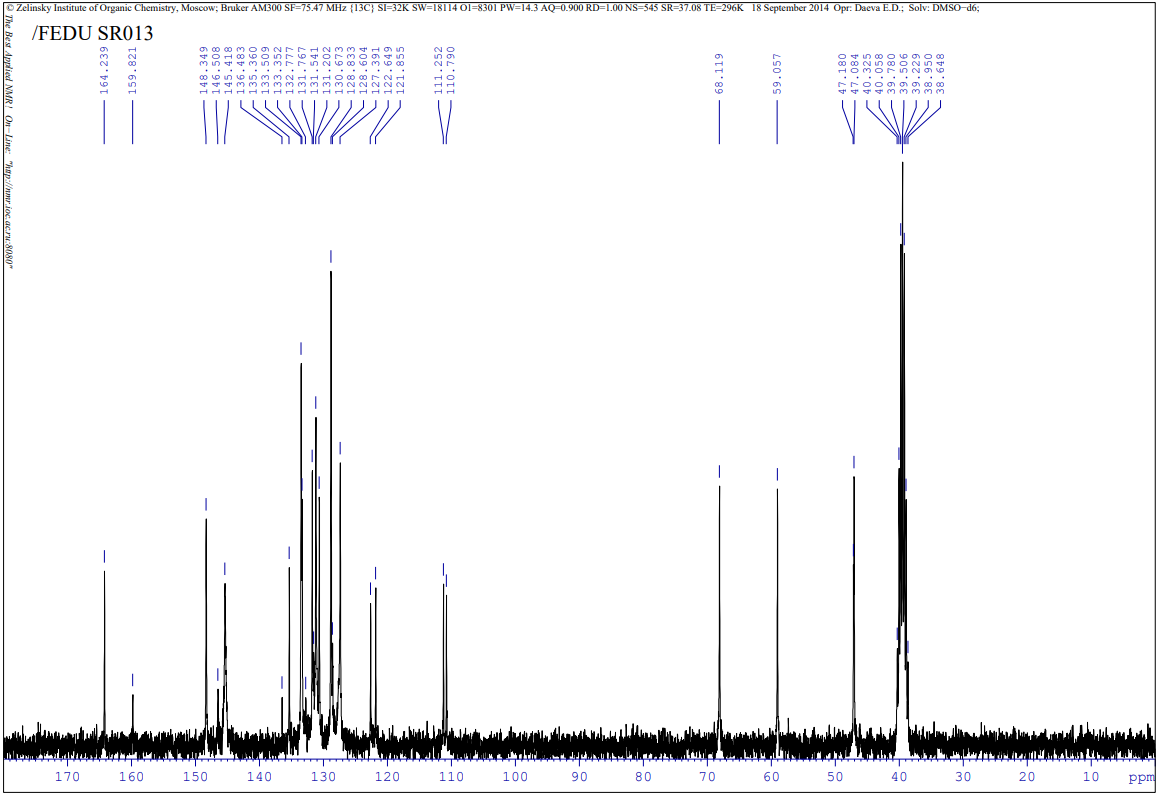


**1H NMR** of 1-((3*SR*,4*RS*,6*SR*)-4,6-bis(4-bromophenyl)-5,5-dicyano-2-oxopiperidin-3-yl)pyridin-1-ium bromide **(4e)**


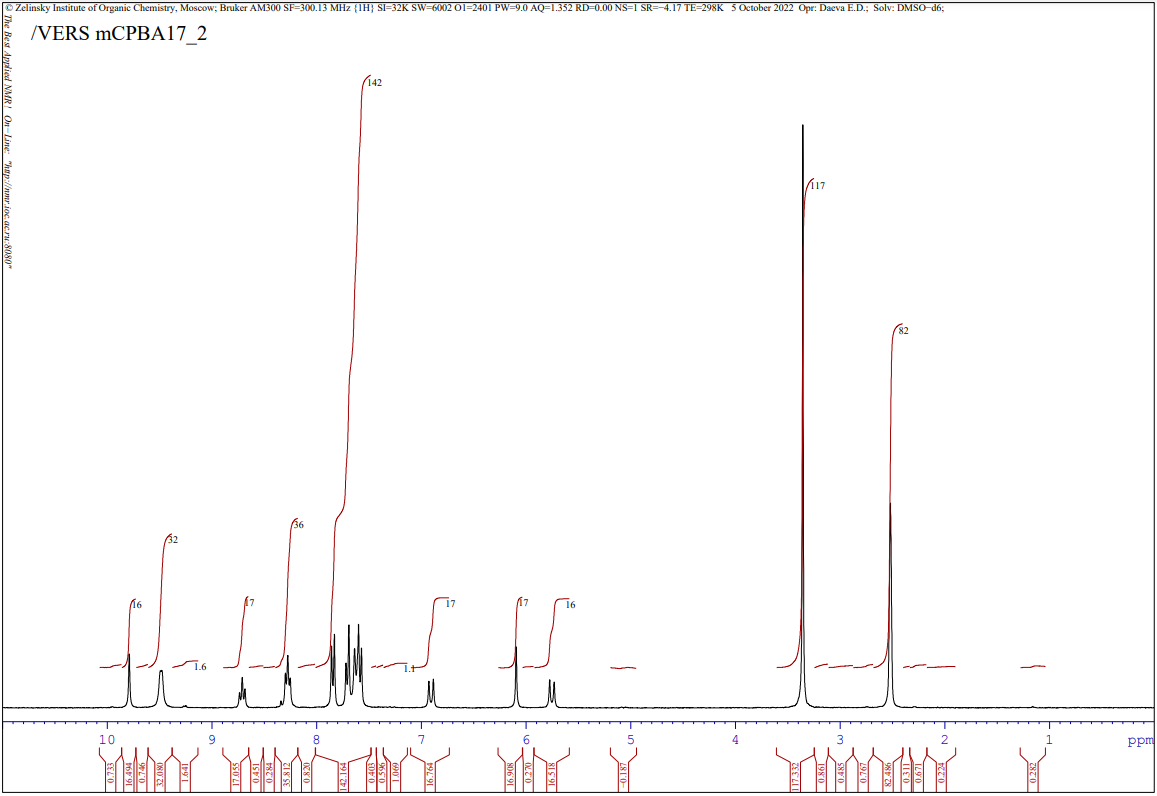


**13C NMR** of **(4e)**


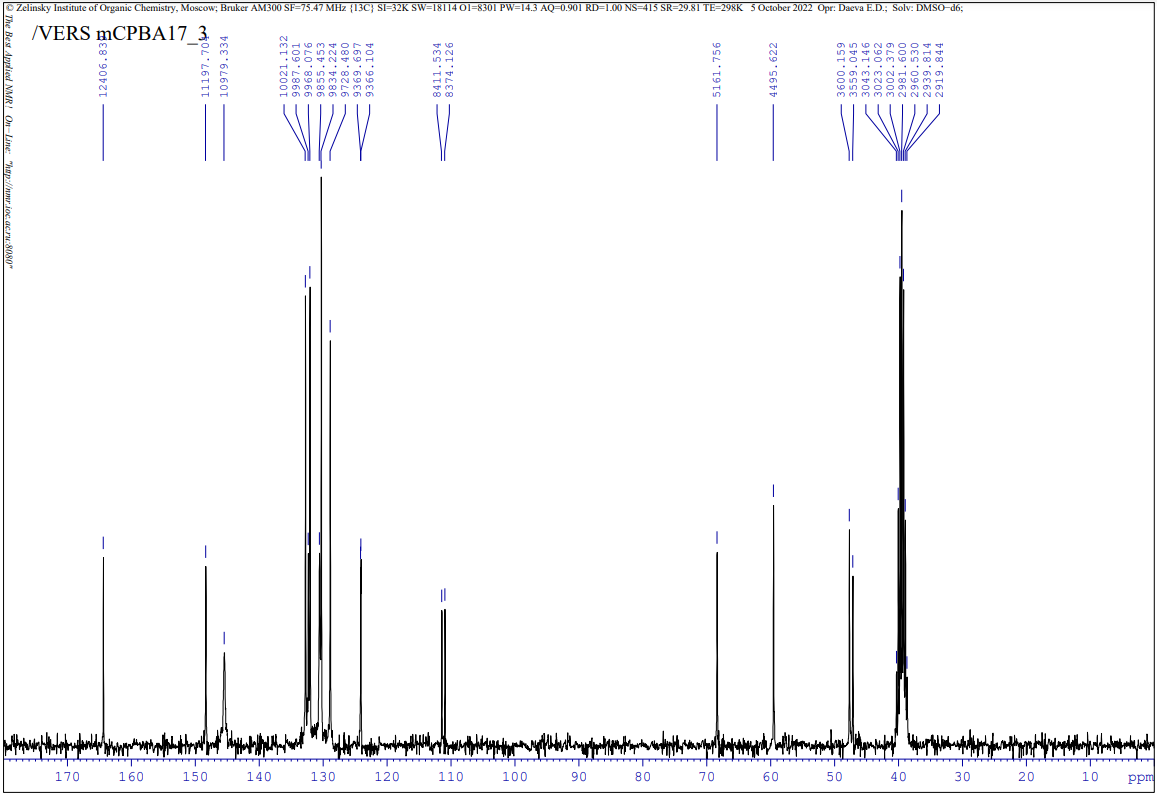


**1H NMR** of 1-((3*SR*,4*RS*,6*SR*)-5,5-dicyano-2-oxo-4,6-di(pyridin-3-yl)piperidin-3-yl)pyridin-1-ium bromide **(4f)**


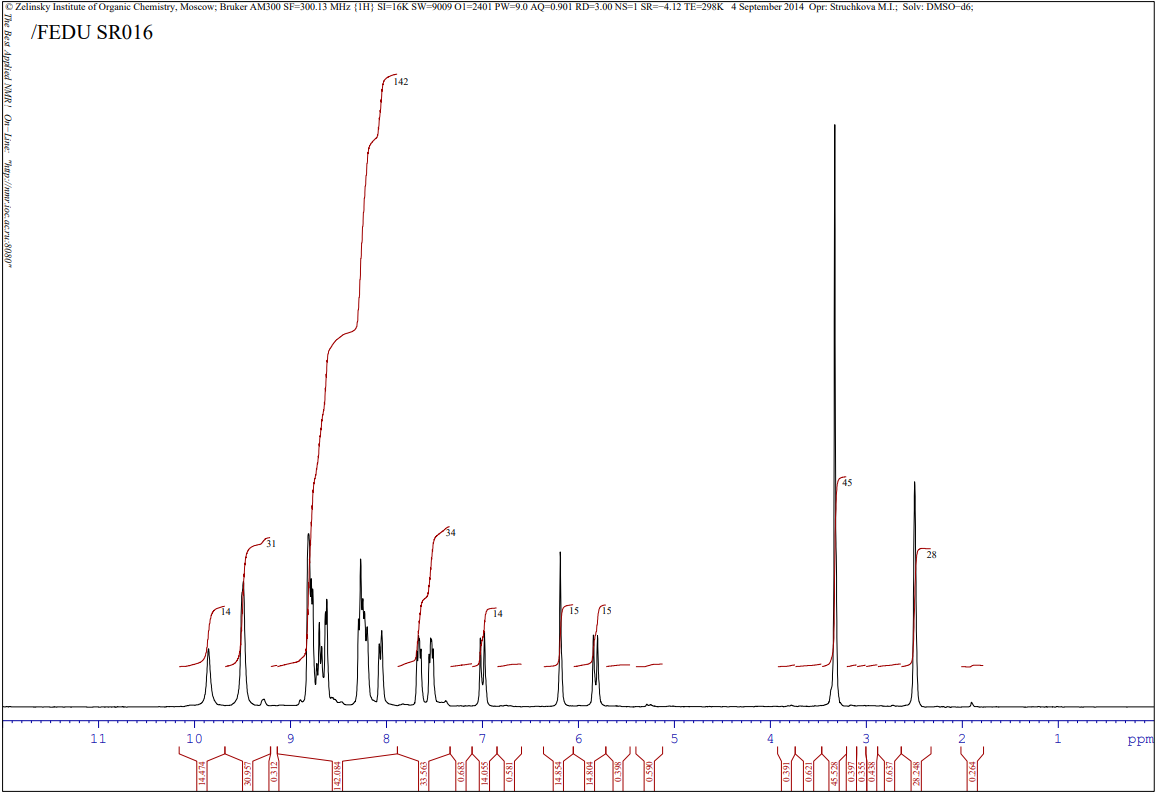


**13C NMR** of **(4f)**


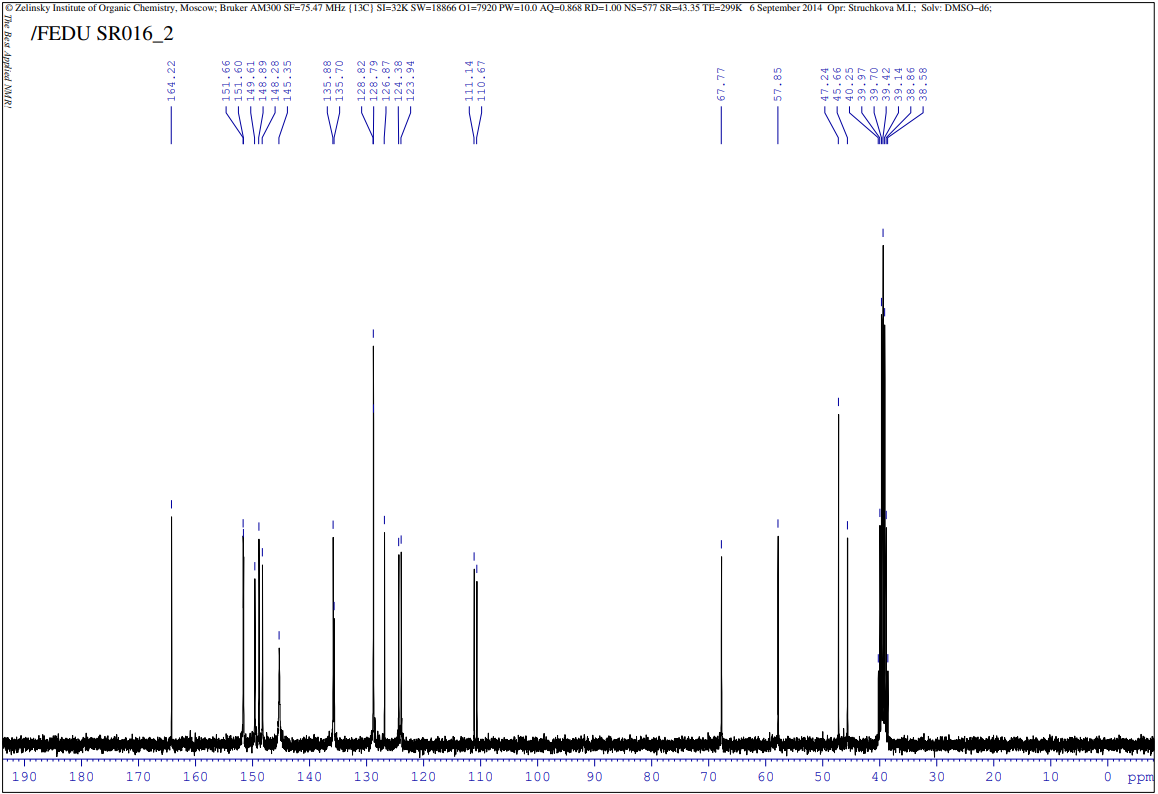


**1H NMR** of 1-((3*SR*,4*RS*,6*SR*)-5,5-dicyano-4,6-bis(4-fluorophenyl)-2-oxopiperidin-3-yl)-3-hydroxypyridin-1-ium bromide **(4g)**


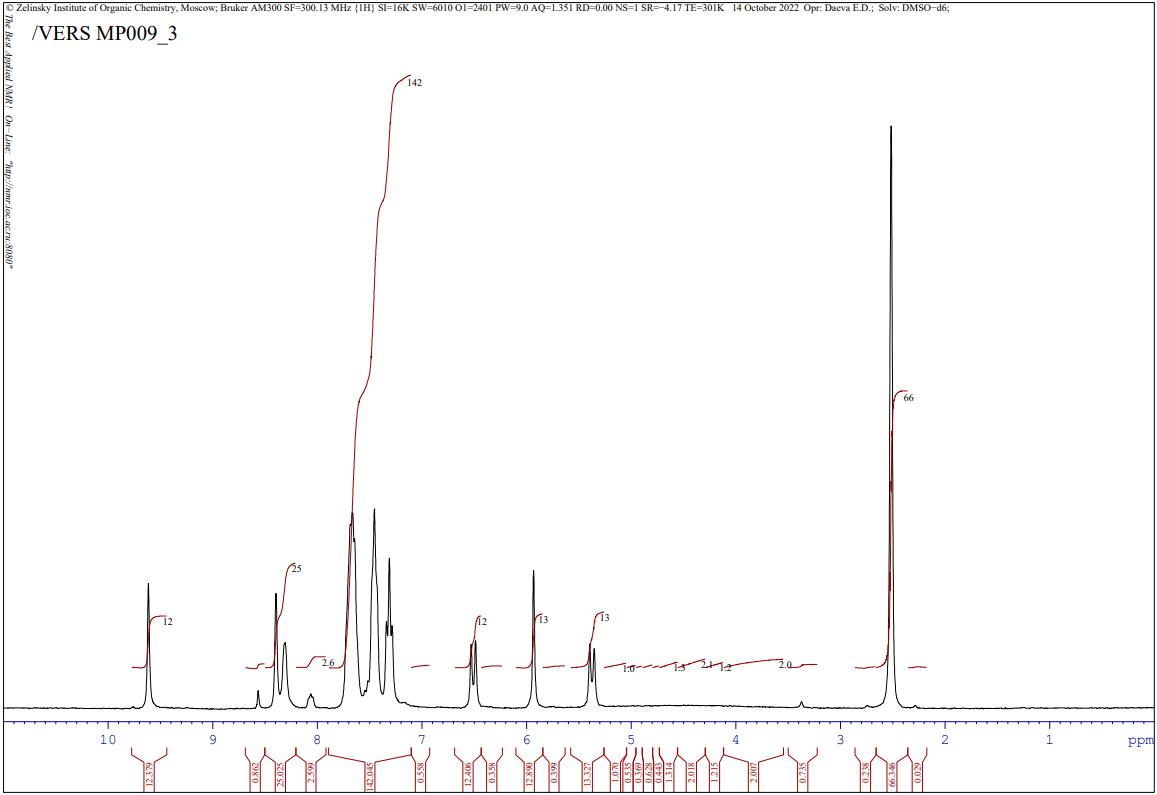


**13C NMR** of **(4g)**
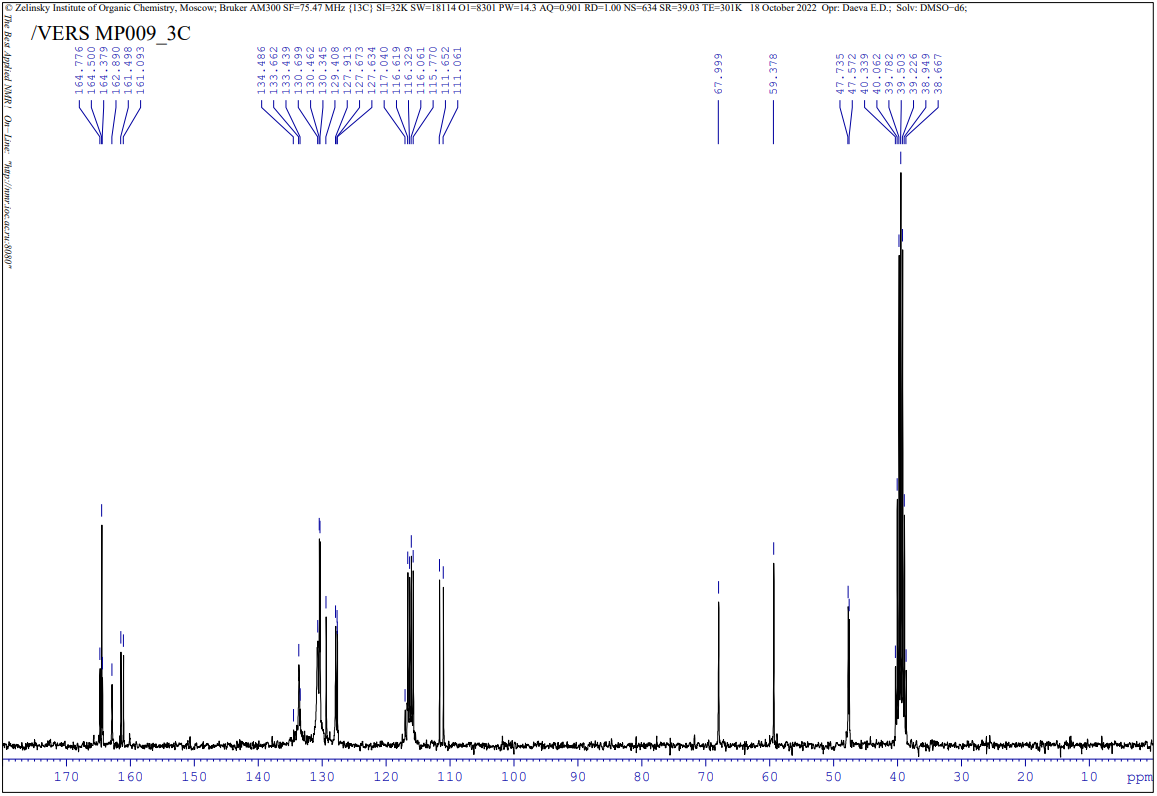


**1H NMR** of 1-((3*SR*,4*RS*,6*SR*)-4,6-bis(4-bromophenyl)-5,5-dicyano-2-oxopiperidin-3-yl)-3-hydroxypyridin-1-ium bromide **(4h)**


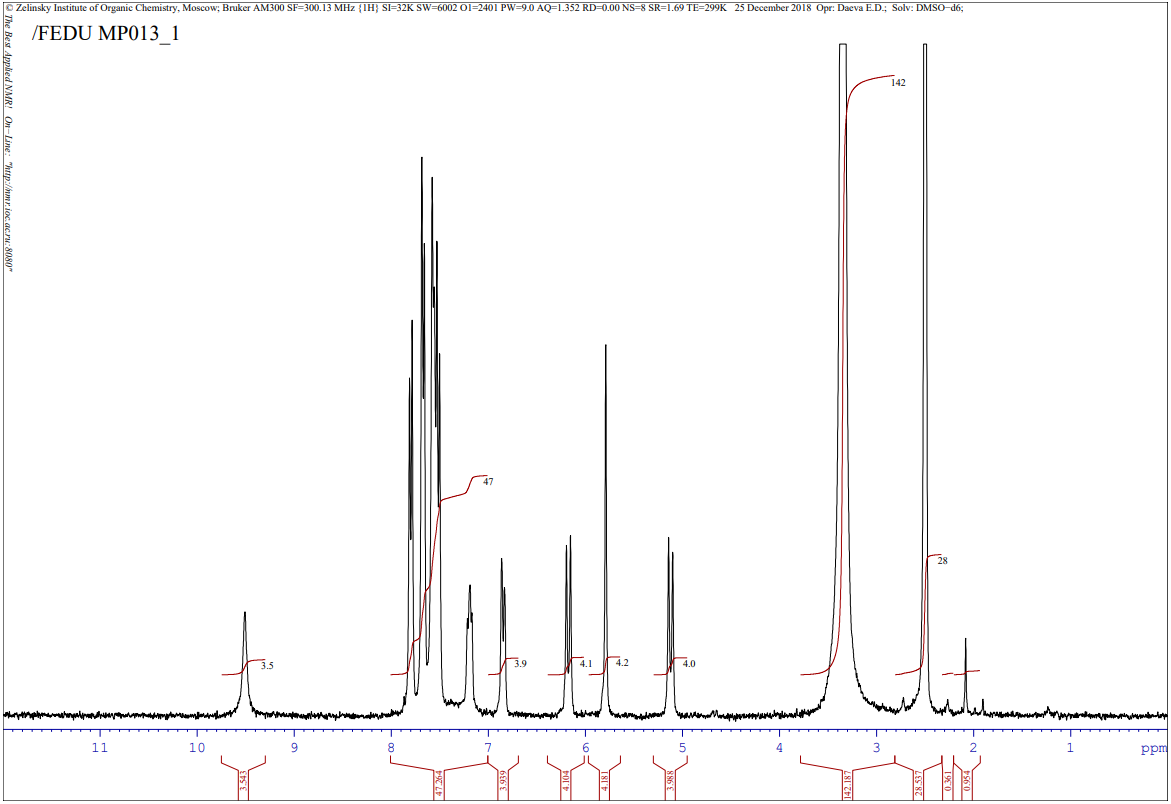


**13C NMR** of **(4h)**


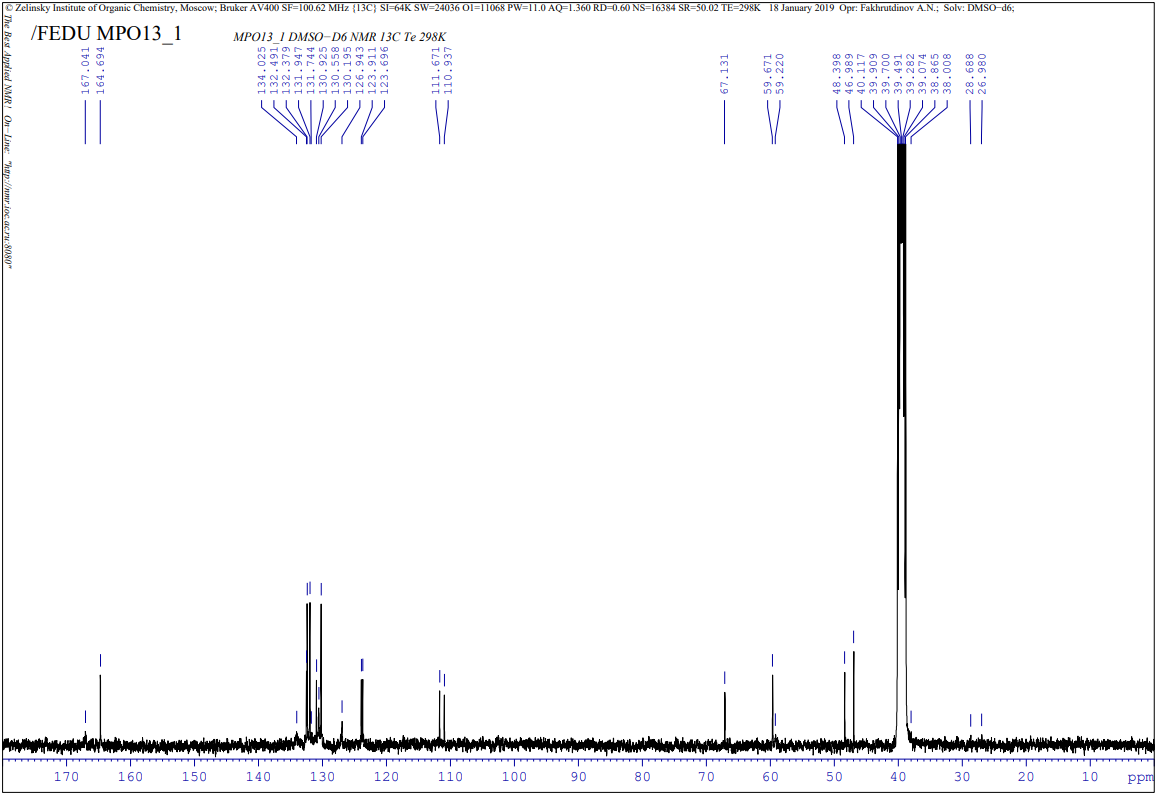


**1H NMR** of 1-((3*SR*,4*RS*,6*SR*)-4,6-bis(4-bromophenyl)-5,5-dicyano-2-oxopiperidin-3-yl)-3-bromopyridin-1-ium chloride **(4i)**

**
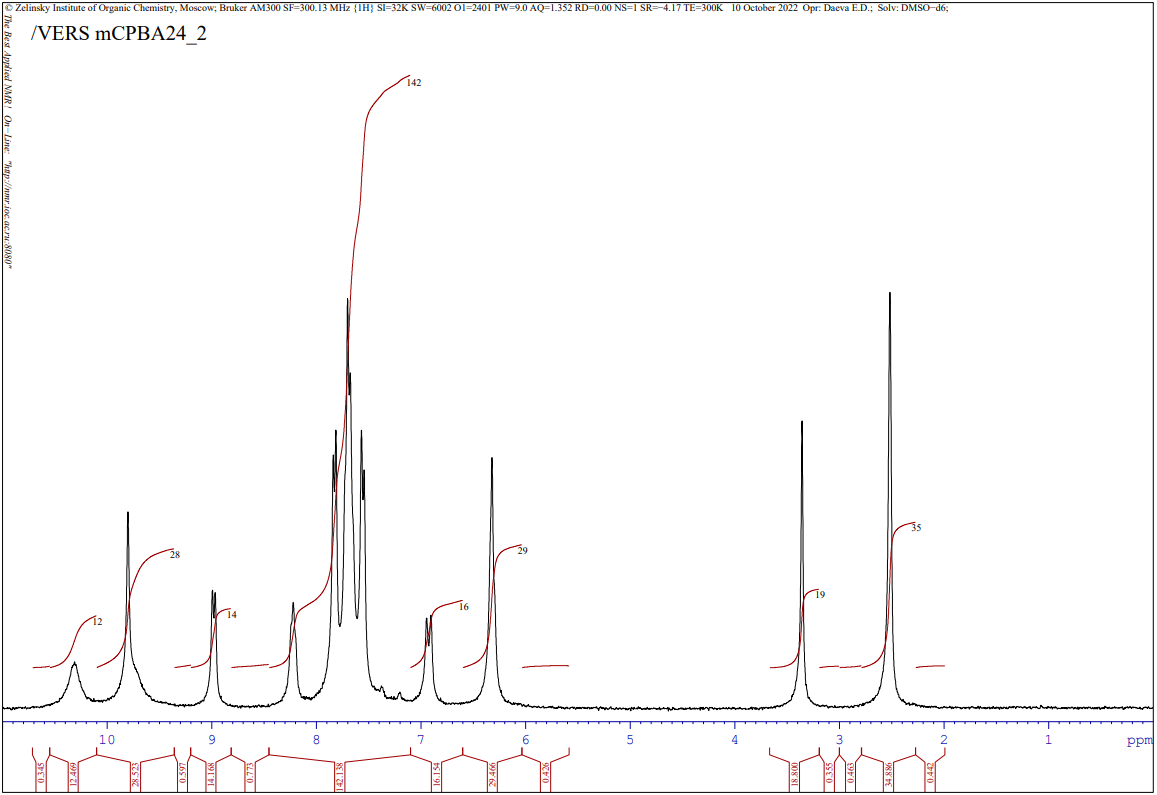
**

**13C NMR** of **(4i)**

**
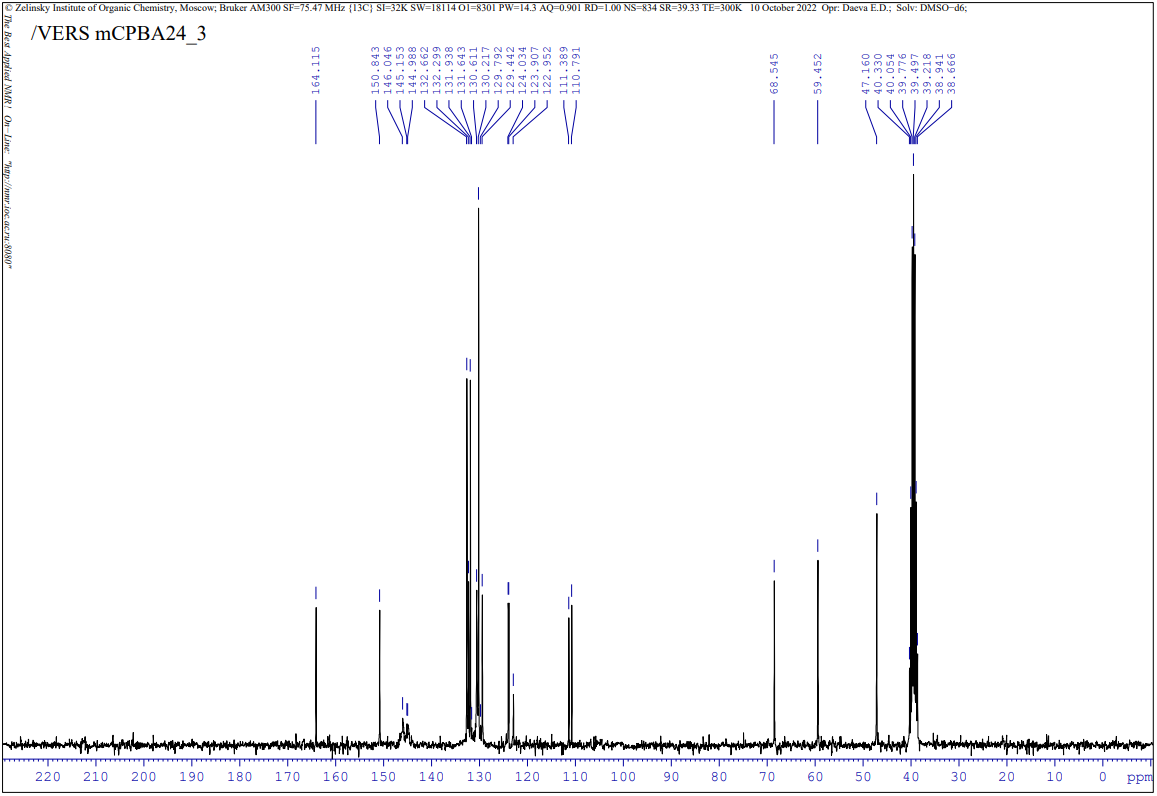
**

# **1H, 13C NMR spectra of compounds 5a-e**

**1H NMR** of 1-((*3SR,4RS,5RS,6SR*)-5-cyano-5-(methoxycarbonyl)-2-oxo-4,6-diphenylpiperidin-3-yl)pyridin-1-ium bromide **(5a)**


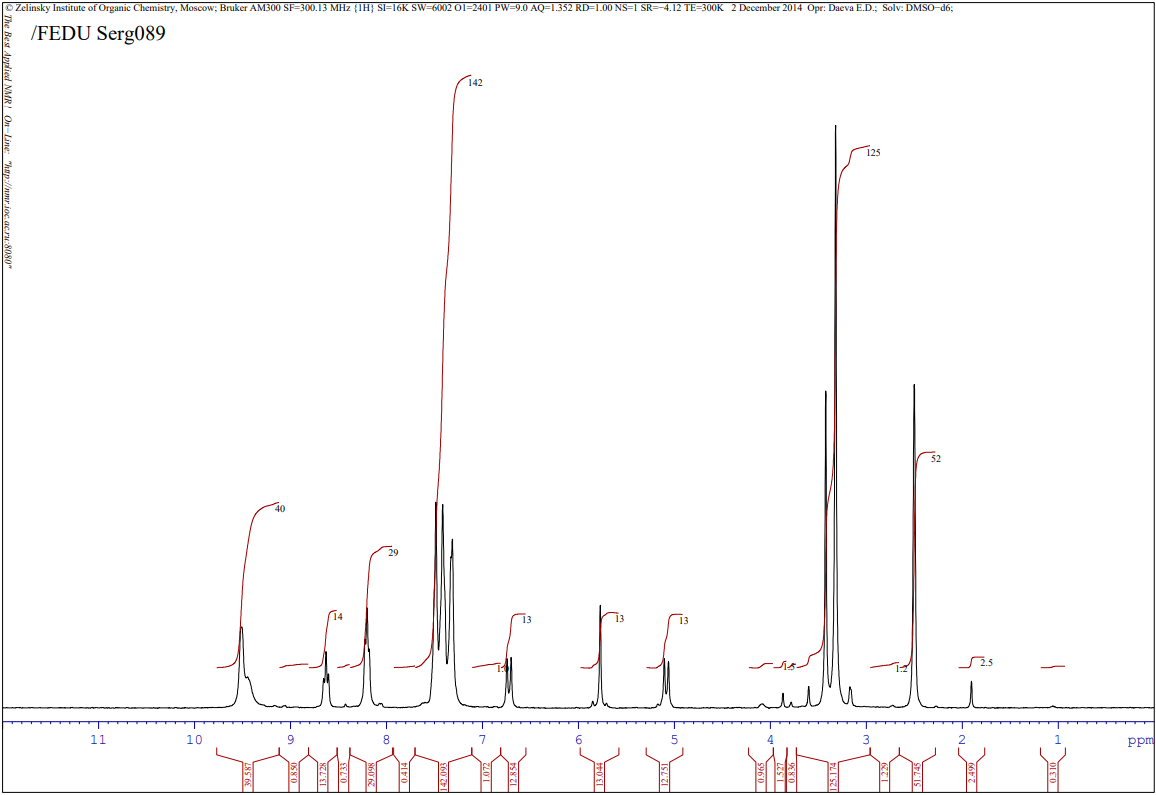


**13C NMR** of **(5a)**


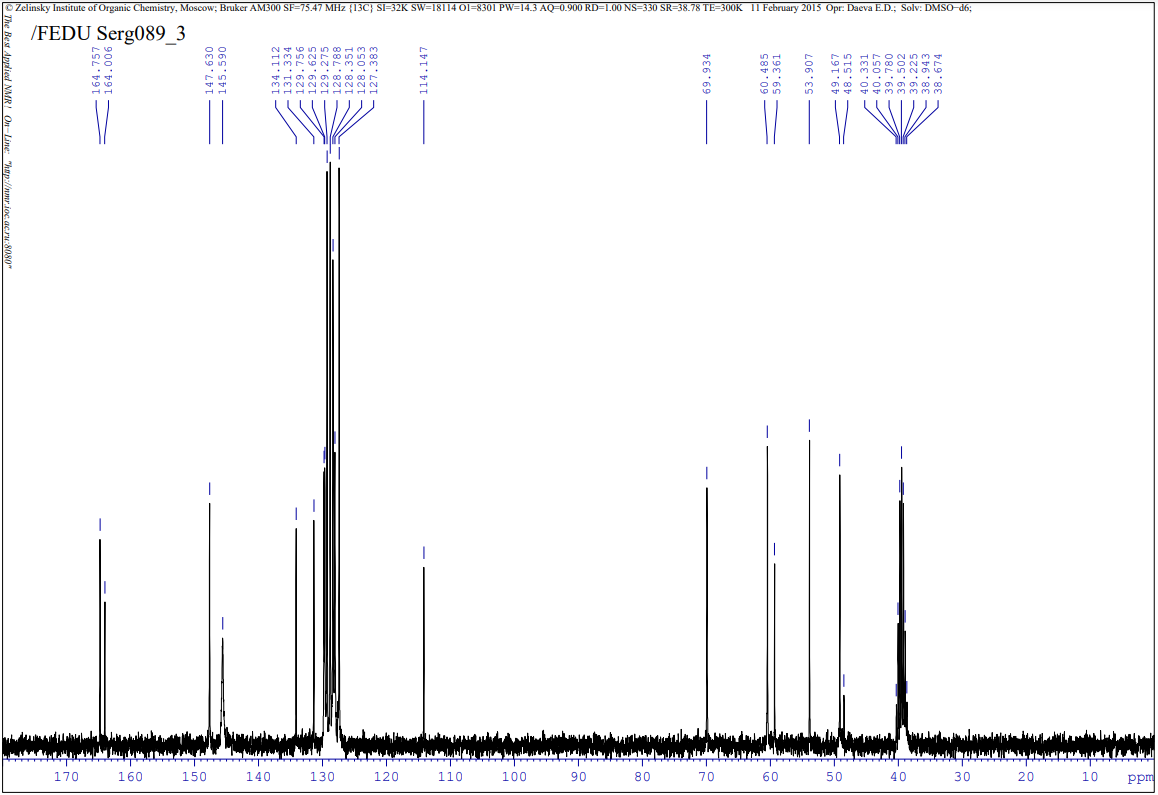


**1H NMR** of 1-((*3SR,4RS,5RS,6SR*)-5-cyano-5-(methoxycarbonyl)-2-oxo-4,6-di-m-tolylpiperidin-3-yl)pyridin-1-ium bromide **(5b)**

**
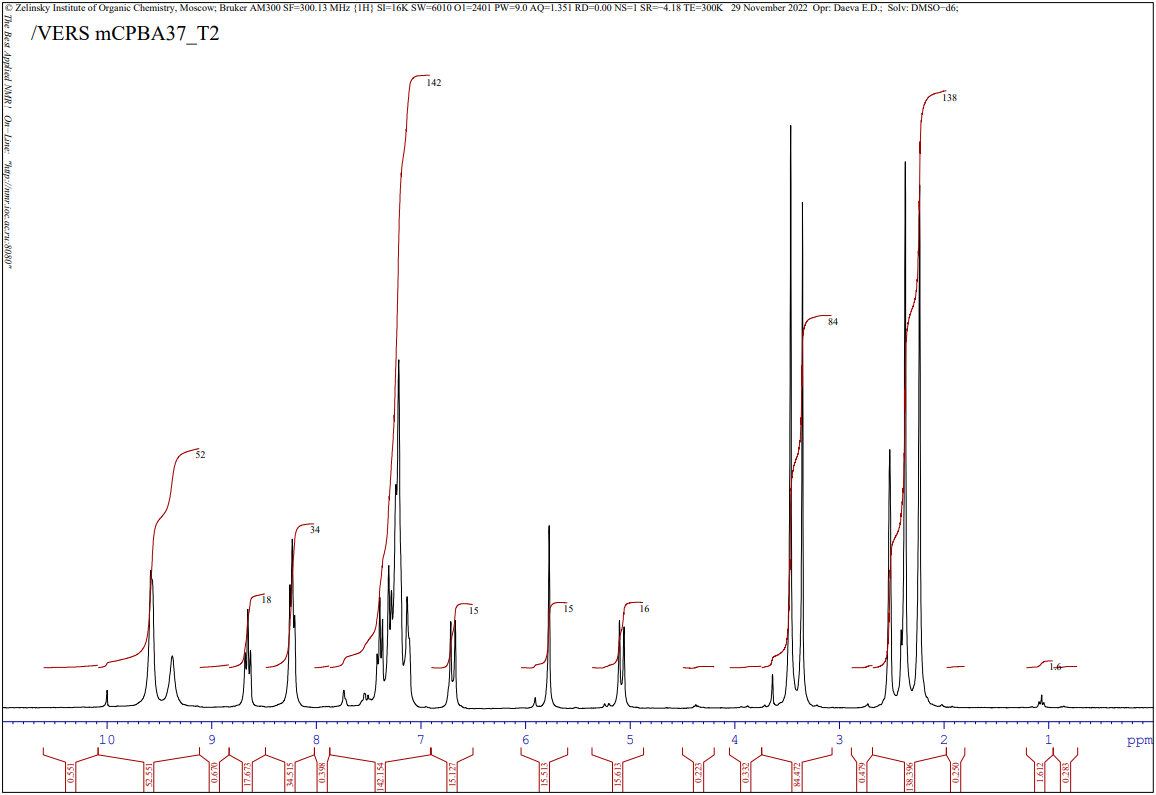
**

**13C NMR** of **(5b)**

**
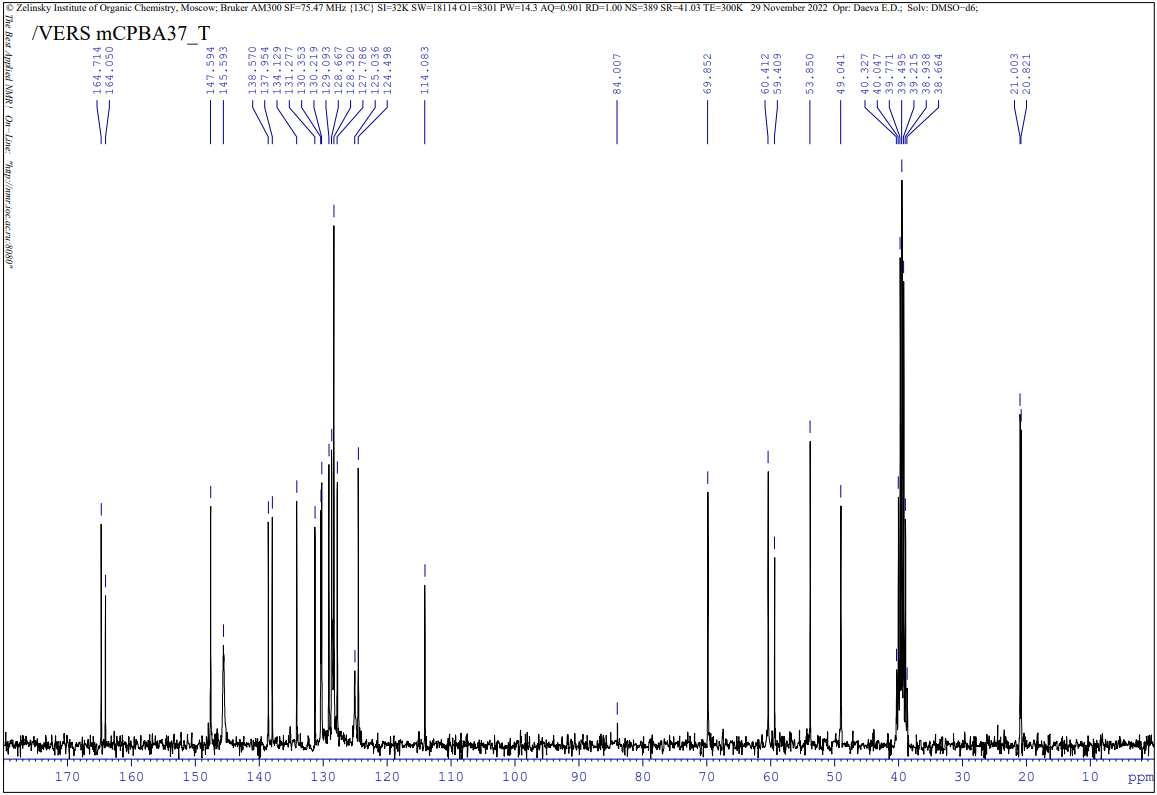
**

**1H NMR** of 1-((*3SR,4RS,5RS,6SR*)-5-cyano-5-(methoxycarbonyl)-2-oxo-4,6-di-p-tolylpiperidin-3-yl)pyridin-1-ium bromide **(5c)**

**
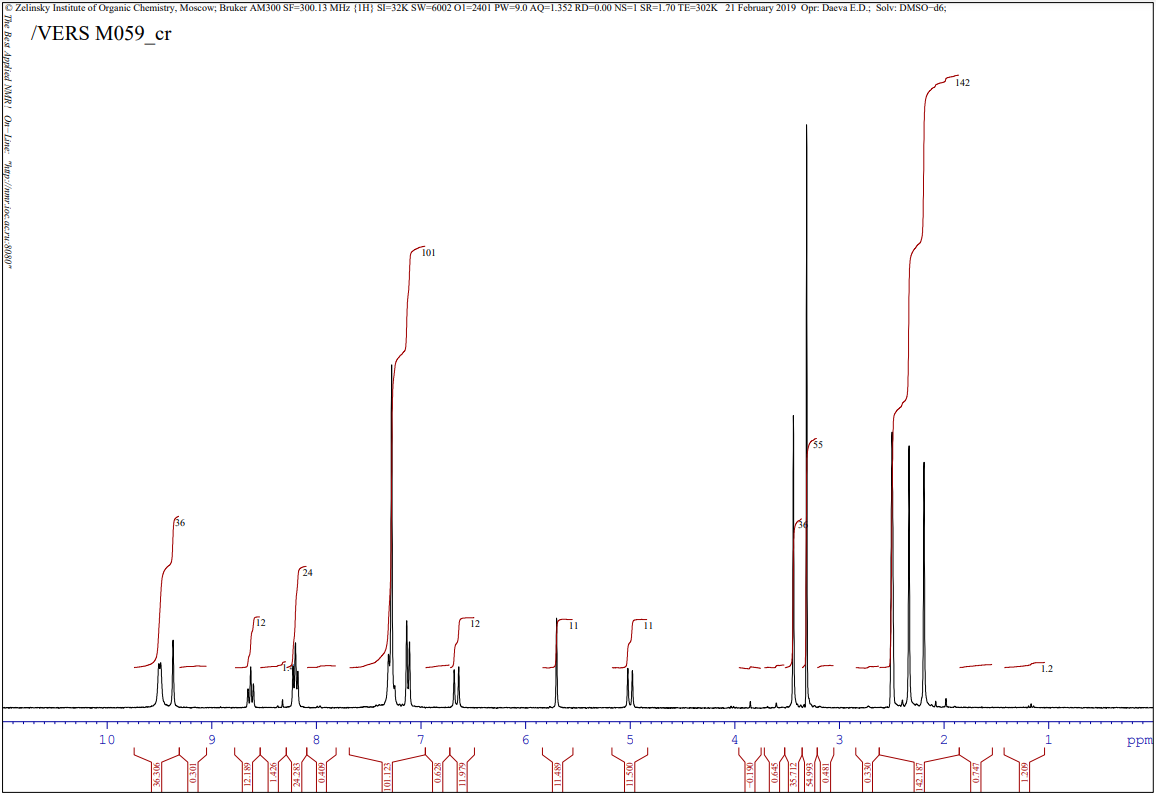
**

**13C NMR** of **(5c)**

**
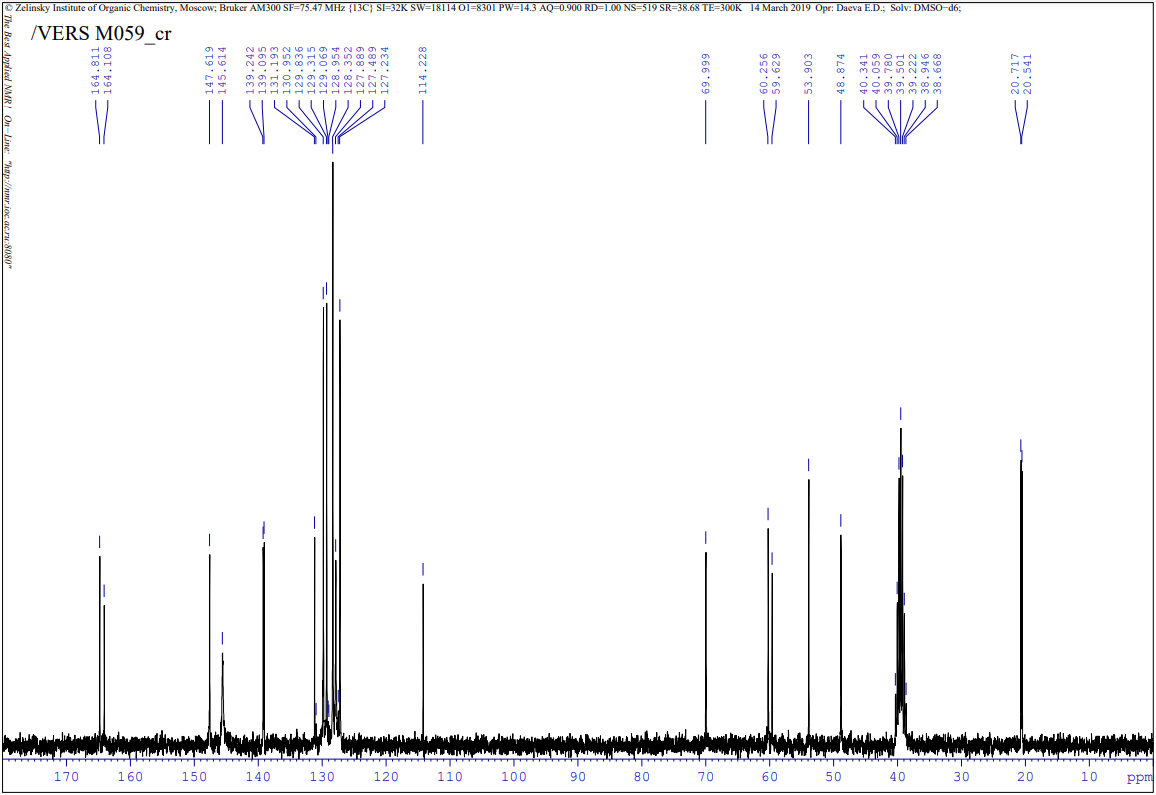
**

**1H NMR** of 1-((*3SR,4RS,5RS,6SR*)-5-cyano-4,6-bis(4-fluorophenyl)-5-(methoxycarbonyl)-2-oxopiperidin-3-yl)pyridin-1-ium bromide **(5d)**

**
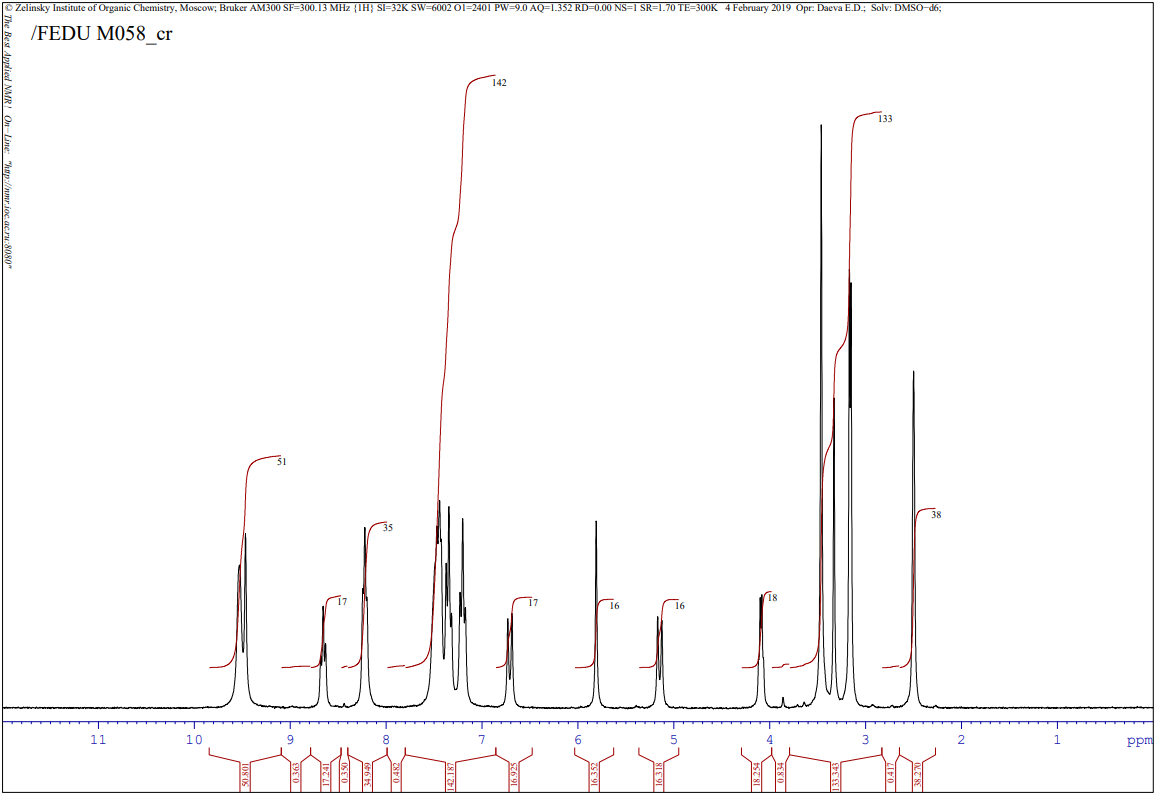
**

**13C NMR** of **(5d)**

**
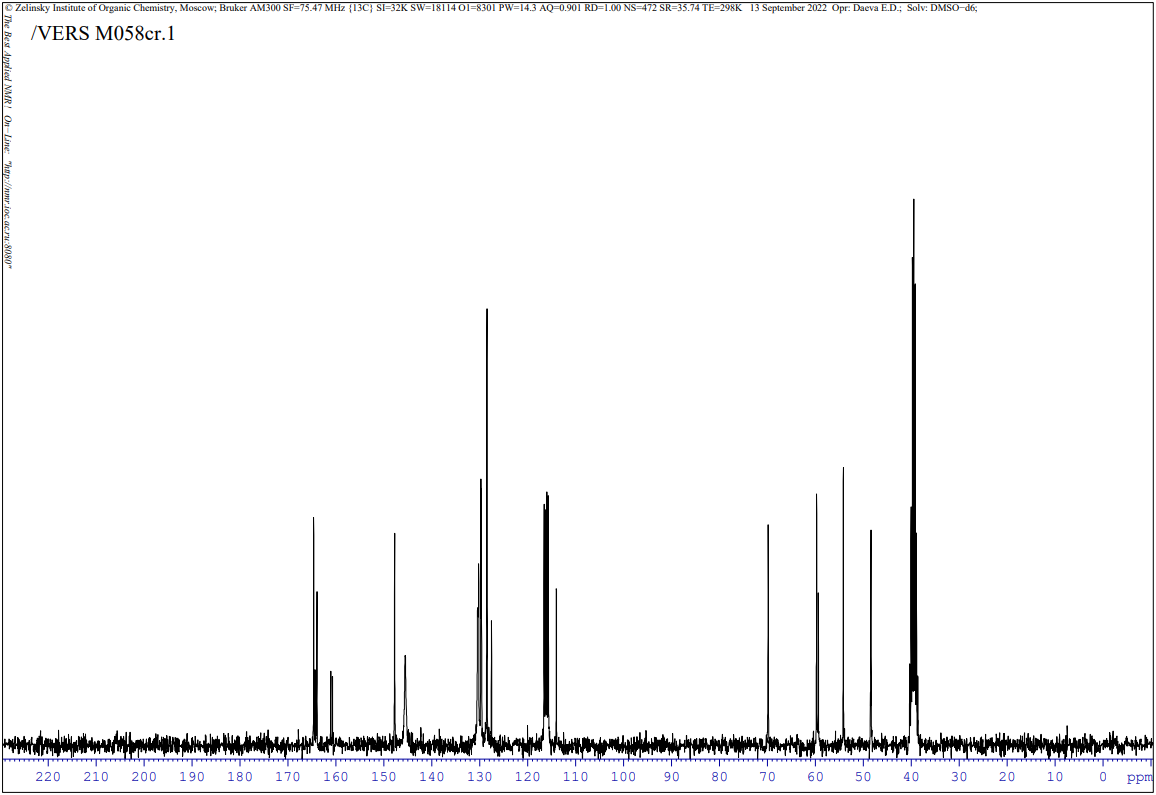
**

**1H NMR** of 1-((*3SR,4RS,5RS,6SR*)-5-cyano-4,6-bis(4-fluorophenyl)-5-(methoxycarbonyl)-2-oxopiperidin-3-yl)pyridin-1-ium bromide **(5e)**

**
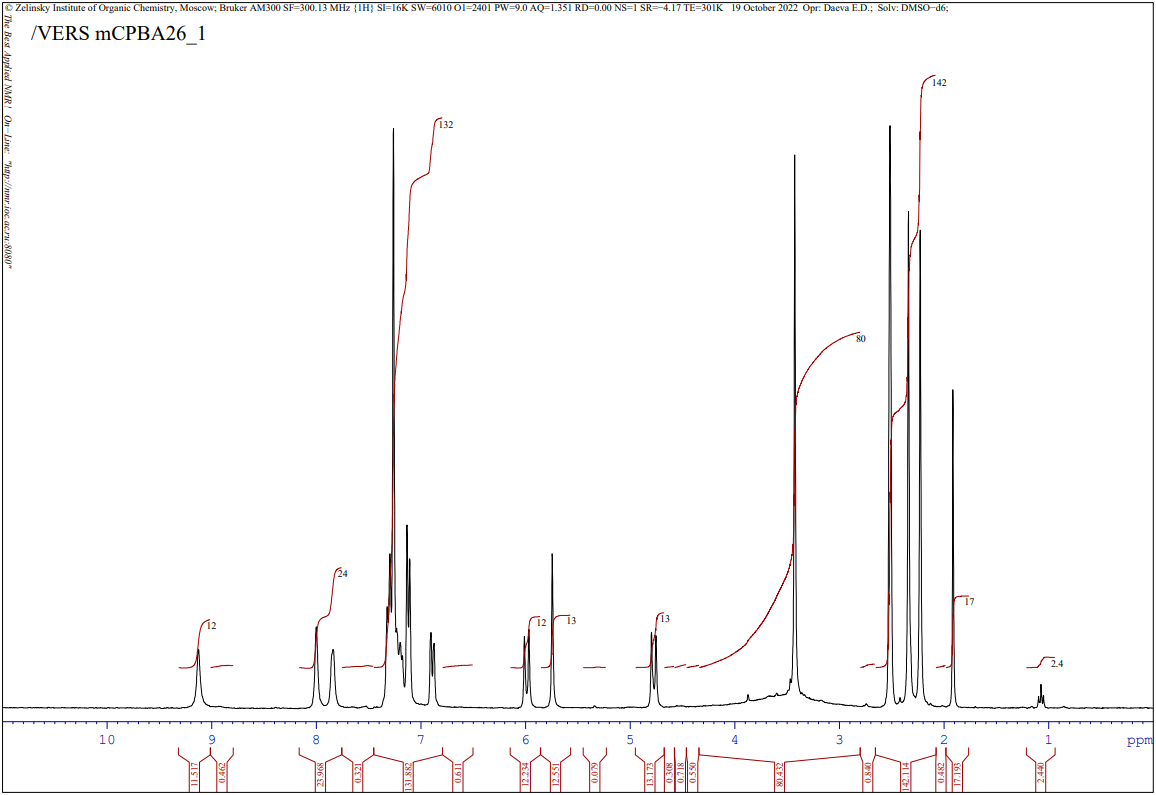
**

**13C NMR** of **(5e)**

**
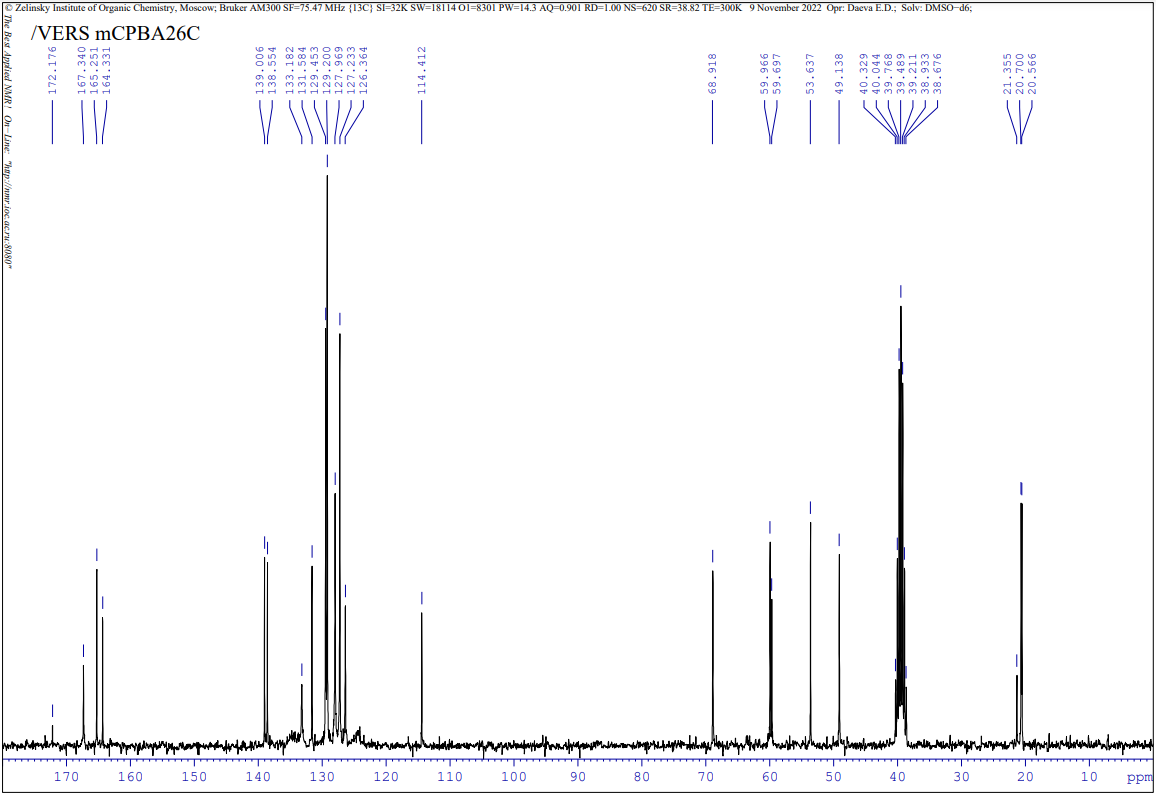
**
