# Supplementary material for: Highly diastereoselective synthesis of piperidine-2-one-substituted pyridinium salts from pyridinium ylides, aldehydes, Michael acceptors and ammonium acetate
Source: Research Square preprint supplement (doi:10.21203/rs.3.rs-3152629/v1), 2023-07-13
Supplement: Supplementary file 2 [file e7181cf956f97b1e98c39e5e.docx]

**Table 1** Synthesis of pyridinium salts of piperidin-2-ones

| Entry | Ar | R1 | R2 | Hal | Product | Yield, %a |
| --- | --- | --- | --- | --- | --- | --- |
| 1 | C6H5 | H | Me | Br | **4a**{1a,2a,3a} | 84 |
| 2 | 3-MeC6H4 | H | Me | Br | **4b**{1b,2b,3a} | 68 |
| 3 | 4-FC6H5 | H | Me | Br | **4c**{1d,2d,3a} | 76 |
| 4 | 3-BrC6H5 | H | Me | Br | **4d**{1e,2e,3a} | 72 |
| 5 | 4-BrC6H5 | H | Me | Br | **4e**{1f,2f,3a} | 76 |
| 6 | 3-PyC6H5 | H | Me | Br | **4f**{1g,2g,3a} | 55 |
| 7 | 4-FC6H5, | 3-OH | Me | Br | **4g**{1d,2d,3b} | 63 |
| 8 | 4-BrC6H5, | 3-OH | Me | Br | **4h**{1f,2f,3b} | 72 |
| 9 | 4-BrC6H5 | 3-Br | Et | Cl | **4i**{1f,2f,3c} | 48 |
| 10 | C6H5 | H | Me | Br | **5a**{1a,2a,3a} | 74 |
| 11 | 3-MeC6H4 | H | Me | Br | **5b**{1b,2b,3a} | 57 |
| 12 | 4-MeC6H4 | H | Me | Br | **5c**{1c,2c,3a} | 47 |
| 13 | 4-FC6H5 | H | Me | Br | **5d**{1d,2d,3a} | 58 |
| 14 | 4-MeC6H4 | 3-OH | Me | Br | **5e**{1c,2c,3b} | 44 |
| Reaction condition: benzaldehyde (4 mmol)/nitrile/pyridinium ylide/ammonium acetate = 2/1/1/2 (mol equiv). The end of the reaction was monitored by TLC  aIsolated yields | | | | | | |
